# Supplementary material for: A liposome-actuated enzyme system and its capability as a self-biomineralized silica nanoreactor
Source: Royal Society of Chemistry journal article supplement (doi:10.1039/c6ra26676b), 2016-12-22
Supplement: c6ra26676b1.pdf [file c6ra26676b1.pdf]

# Supplementary Information

## A liposome-actuated enzyme system and their capability as self-biomineralized silica nanoreactors

*Sofía Municoy and Martín G. Bellino\**

### EXPERIMENTAL SECTION

**Preparation of urease-containing liposomes.** The urease-containing liposomes were prepared by the lipid film hydration and extrusion method:<sup>S1-S3</sup> suitable amounts of dipalmitoylphosphatidylcholine (DPPC) and cholesterol (1:0.2) were dissolved in chloroform and dried to a film under a stream of nitrogen. The dry lipid film was hydrated by adding 2 ml of an aqueous solution of urease (2 mg/ml) and sonicated for 30 minutes (above  $T_m$  of the lipids (50 °C) using a bath ultrasonic cleaner (Power = 500 W). Liposomes were sized by multiple extrusion above  $T_m$  of the lipids (50 °C) through polycarbonate membrane filters of decreasing pore diameters of 0.8  $\mu\text{m}$  and 0.4  $\mu\text{m}$  (5 and 15 passages respectively). The liposome suspension obtained was a mixture of the urease-containing liposomes and free urease. The sample was centrifugated at 6000 rpm for at least 30 min.<sup>S4-S5</sup> The supernatant containing the free urease was then discarded and the pellet containing encapsulated urease into liposomes was resuspended with Milli-Q  $\text{H}_2\text{O}$ . The mean vesicle size and size distribution of urease-containing liposomes were determined by Dynamic Light Scattering (DLS).

**Urease activity assay.** A colorimetric assay based on the hydrolysis of urea was used for the activity measure of encapsulated and free urease, as monitored by the pH-sensitive dye bromothymol blue (BTB).<sup>24</sup> A solution containing 50  $\mu\text{M}$  BTB, 0.2 mM EDTA and a known amount of the urease-loaded vesicles or free urease/liposomes system was placed in a UV cell, stirred and annealed to the desired temperature. Then 22  $\mu\text{l}$  of a solution 0.1 M urea was added to the cell and the kinetics was monitored by following the absorption at 617 nm on a Varian Cary 50 UV-Vis Spectrometer (Agilent Technologies).<sup>S6</sup> The increment of the absorbance with time was used to characterize the urease activity in both systems. The specific activity ( $\text{U mgenzyme}^{-1}$ ) of urease was calculated from the slope of the linear section of the Product vs time plots.<sup>S7</sup>

**Synthesis of mesoporous silica thin film.** Mesoporous thin films were produced by combining sol-gel synthesis with evaporation-induced self-assembly and processed under controlled environmental conditions and thermal treatments, following well-established protocols.<sup>S8-S10</sup> The mesoporous  $\text{SiO}_2$  films were deposited by spin-coating from alcohol-

water acidic solutions containing the inorganic precursor Si(OEt)<sub>4</sub> (TEOS) and Pluronic F127 ((EO)<sub>106</sub>(PO)<sub>70</sub>(EO)<sub>106</sub>, where EO and PO represent ethylene oxide and propylene oxide blocks, respectively) as polymeric template. TEOS was prehydrolyzed by refluxing for 1 h in a water/ethanol solution; [H<sub>2</sub>O]/[Si] = 1; [EtOH]/ [TEOS] = 5. To this prehydrolyzed solution was added surfactant, alcohol, and acidic water in order to prepare the precursor solutions, with final composition TEOS:EtOH:H<sub>2</sub>O (0.1 M HCl): F127 equal to 1:40:5:0.0075 mol ratios. The relatively large [F127]/[Si] ratio ensures a high accessible porosity. After deposition by spin-coating, as-prepared films were placed in a 50% RH chamber for 1 h. The films were then subjected to a consolidation thermal treatment, which consisted of heating at 60 °C for 1 h and at 130 °C for another 1 h. Finally, the films were calcined at 350 °C for 2 h in order to remove the template.

**Synthesis of silica nanostructures.** For the preparation of the silica nanostructures a known amount of a solution containing 3.2 M urea and urease-loaded liposomes (0.4 mg urease/g lipid) was placed onto a mesoporous silica thin film. The sample was then incubated at 25 °C or 45 °C for 24 hs in a humidified chamber to favour a slow and controlled evaporation of the droplet. Once the droplet dried, the solid was resuspended with 100 µl of Milli-Q H<sub>2</sub>O and then centrifugated at 6000 rpm for 30 min. The obtained precipitate containing the liposomes covered with a silica shell was washed several times with Milli-Q H<sub>2</sub>O and stored at 4 °C. The same protocol was used for the free urease/liposome system.

**Characterization.** The morphology of the precipitates was studied by field emission scanning electron microscopy (SEM, Carl Zeiss NTS SUPRA 40) and transmission electron microscopy (TEM) using a Philips EM-301 electron microscope. The samples for TEM were prepared by dispersing the final samples in Milli-Q H<sub>2</sub>O; this dispersion was then dropped on carbon-copper grids covered by an amorphous carbon film. Liposomes size distribution was measured using a BI-200SM Laser Light Scattering Instruments (DLS, Brookhaven Instruments). Silica particles size analysis was done with software for image analysis (Image J). The T<sub>m</sub> of DPPC/cholesterol liposomes was determined by Differential Scanning Calorimetry (DSC) and Turbidity.<sup>S11-S12</sup> DSC measurements were performed on approximately 500 µL of vesicles suspensions with a Setaram Labsis-DSC. The measurements were performed in the temperature interval from 15 to 65 °C, with 5 °C min<sup>-1</sup> heating. Turbidity measurements were carried out on a Varian Cary 50 UV-Vis Spectrometer (Agilent Technologies) by using Milli-Q H<sub>2</sub>O as a reference. Mesoporous film thickness, volume and pore size distribution values were obtained from Environmental Ellipsometric Porosimetry (EEP, SOPRA GES5A).<sup>S8,S9</sup>

- S1 P. Walde and S. Ichikawa, *Biomol. Eng.* 2001, 18, 143.
- S2 S. Municoy and M. G. Bellino, *ChemistrySelect* 2016, 1, 723.
- S3 M.-S. Martina, J.-P. Fortin, C. Ménager, O. Clément, G. Barratt, C. Grabielle-Madelmont, F. Gazeau, V. Cabuil and S. Lesieur, *J. Am. Chem. Soc.* 2005, 127, 10676.
- S4 V. M. Madeira, *BBA-Gen. Subjects* 1977, 499, 202.
- S5 M. Li, M. J. Hanford, J.-W. Kim and T. L. Peeples, *J. Biol. Eng.* 2007, 1, 1.
- S6 G. P. Gorbenko, (*BBA*)-*Biomembranes* 1998, 1370, 107.
- S7 K. Wilson, J. Walker, Principles and techniques of practical biochemistry, Cambridge University Press, 2000.

- S8 M. G. Bellino, I. Tropper, H. Duran, A. E. Regazzoni and G. J. A. A. Soler-Illia, *Small* 2010, 6, 1221.
- S9 M. G. Bellino and G. J. A. A. Soler-Illia, *Small* 2014, 10, 2834.
- S10 G. Soler-Illia, P. Angelomé, M. Fuertes, A. Calvo, A. Wolosiuk, A. Zelcer, M. Bellino and E. Martínez, *J. Sol-gel Sci. Techn.* 2011, 57, 299.
- S11 K. Colbow, *Biochim. Biophys. Acta* 1978, 512, 97-104.
- S12 F. Severcan, N. Kazanci, Ü. Baykal, Ş. Süzer, *Biosci. Rep.* 1995, 15, 221.
- S13 B. Krajewska, R. Van Eldik and M. Brindell, *J. Biol. Inorg. Chem.*, 2012, 17, 1123.

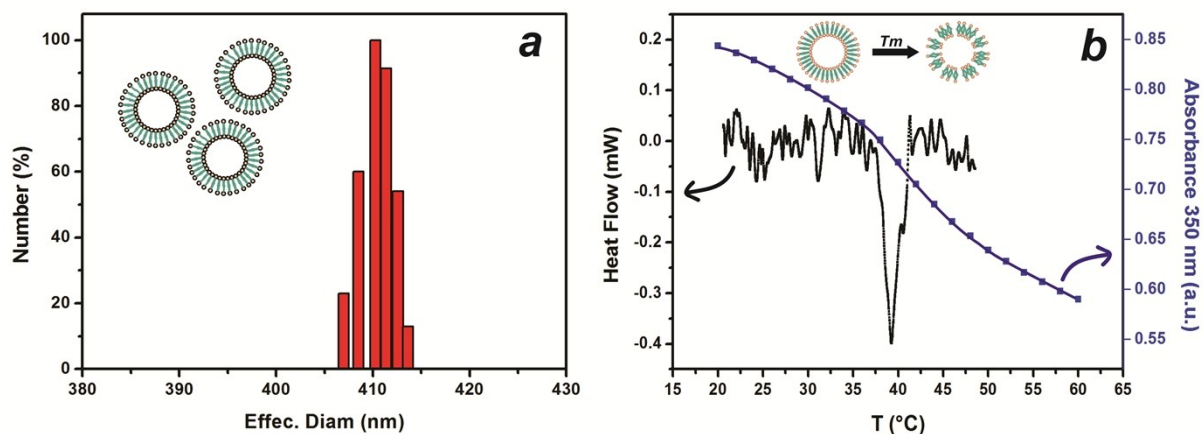

**Figure S1.** DPPC/Cholesterol liposomes characterization. a) The DLS graph reveals the size distribution of liposome (average size = 410 nm). b) DSC thermogram (black) and Turbidity measurement (blue) of DPPC/Cholesterol liposomes. The sharp black peak at approximately 40 °C corresponds to the lamellar gel-to-liquid crystalline phase transition ( $T_m$ ) of lipid bilayer. The midpoint temperature of the transition (blue curve) also indicates that  $T_m = 40$  °C.

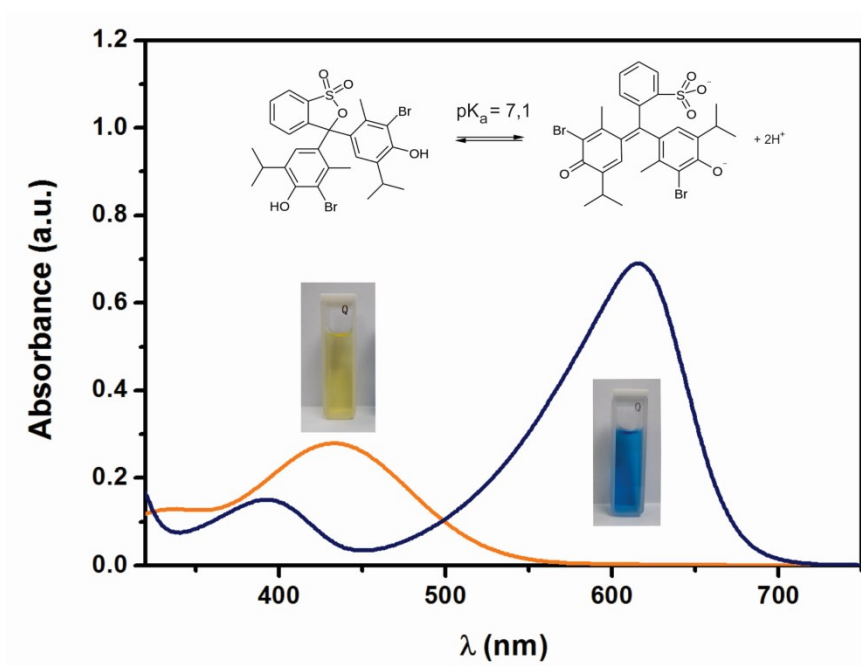

**Figure S2.** Absorption spectra of dye bromothymol blue: in acidic solutions, it appears yellow while in basic solutions it is blue. The yellow (BTB) and the blue (BTB<sup>-</sup>) forms have its maximum absorbance at 432 nm and 617 nm, respectively.

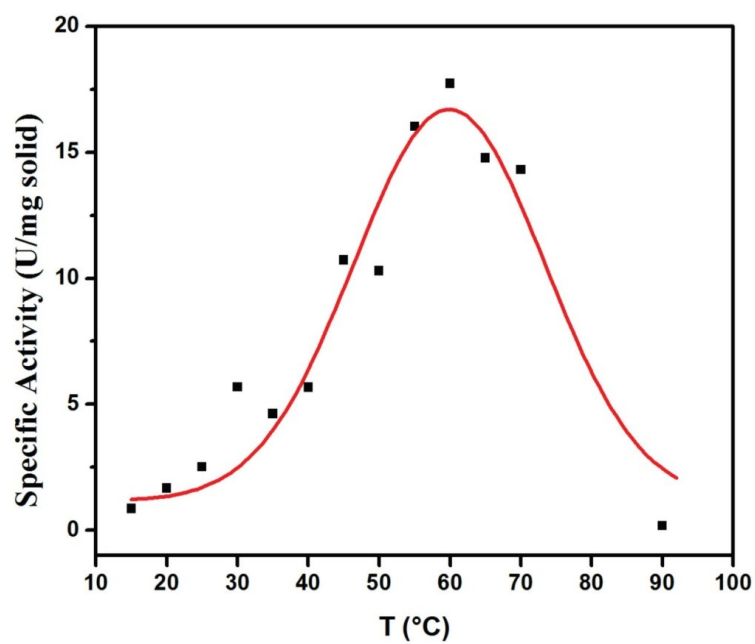

**Figure S3.** The dependence of urease activity on temperature. The optimum temperature of the urease was found at 60 °C, in agreement with previous research.<sup>S13</sup>

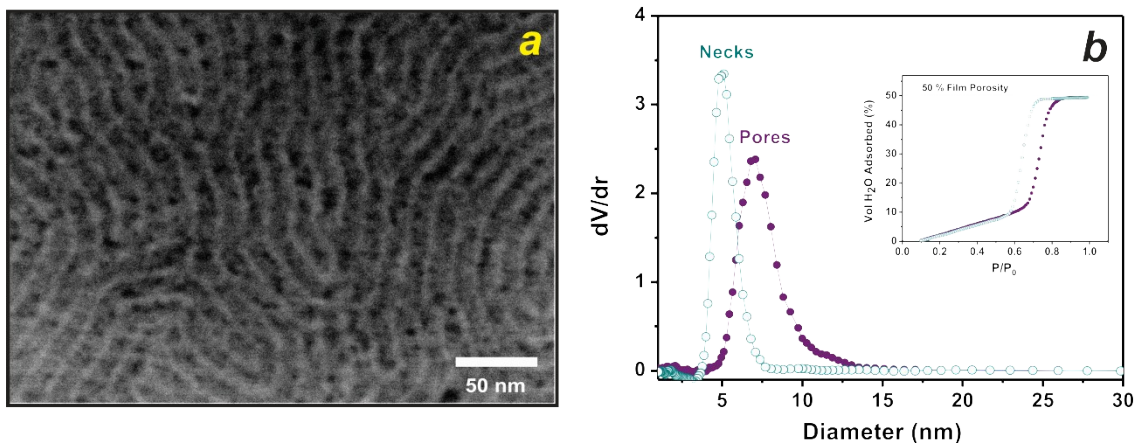

**Figure S4.** Mesoporous silica thin film characterization. a) Top-view SEM image of the mesoporous thin film. b) Typical pore and neck size distribution of the mesoporous silica thin films used in this work. Inset: water adsorption-desorption isotherms at 298 K. Isotherms were determined by EEP. Film thickness and the real component of the refractive index were obtained from the ellipsometric parameters  $\psi(\lambda)$  and  $\Delta(\lambda)$  under nitrogen flux containing variable water vapor quantities;  $P/P_0$  was varied from 0 to 1 ( $P_0$  being the saturation water vapor at 298 K); the film refractive index was described according to a modified Cauchy equation. Film pore volume and pore size distribution at each  $P/P_0$  were obtained by modeling the refractive index obtained according to a three-medium Bruggeman effective medium approximation (BEMA); pore size distributions were obtained from the analysis of the refractive index variation, using the WinElli 2 software (SOPRA, Inc.).

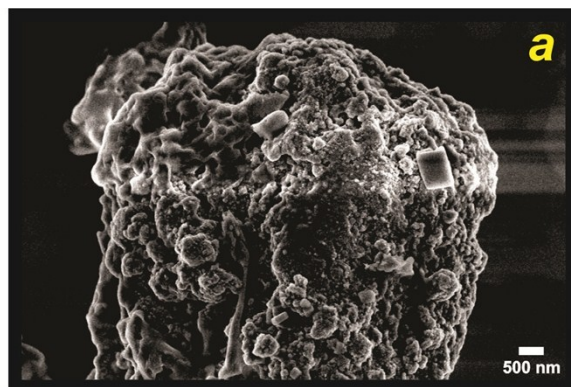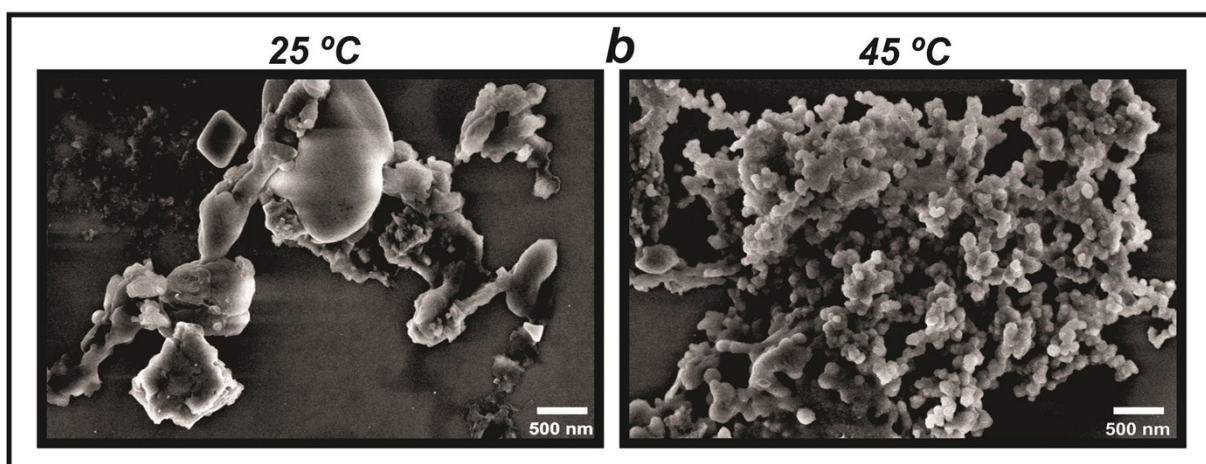

**Figure S5.** Morphologies of precipitates obtained by enzyme/liposome assembly at 45 °C (a) and free urease/liposome system at 25 ° and at 45 °C (b), where uncontrolled precipitation is observed.
